# Supplementary material for: Spatial and Temporal Expression Characteristics of the HBB Gene Family in Six Different Pig Breeds
Source: MDPI journal article supplement (doi:10.3390/genes13101822), 2022-10-09
Supplement: s1 [file s1]

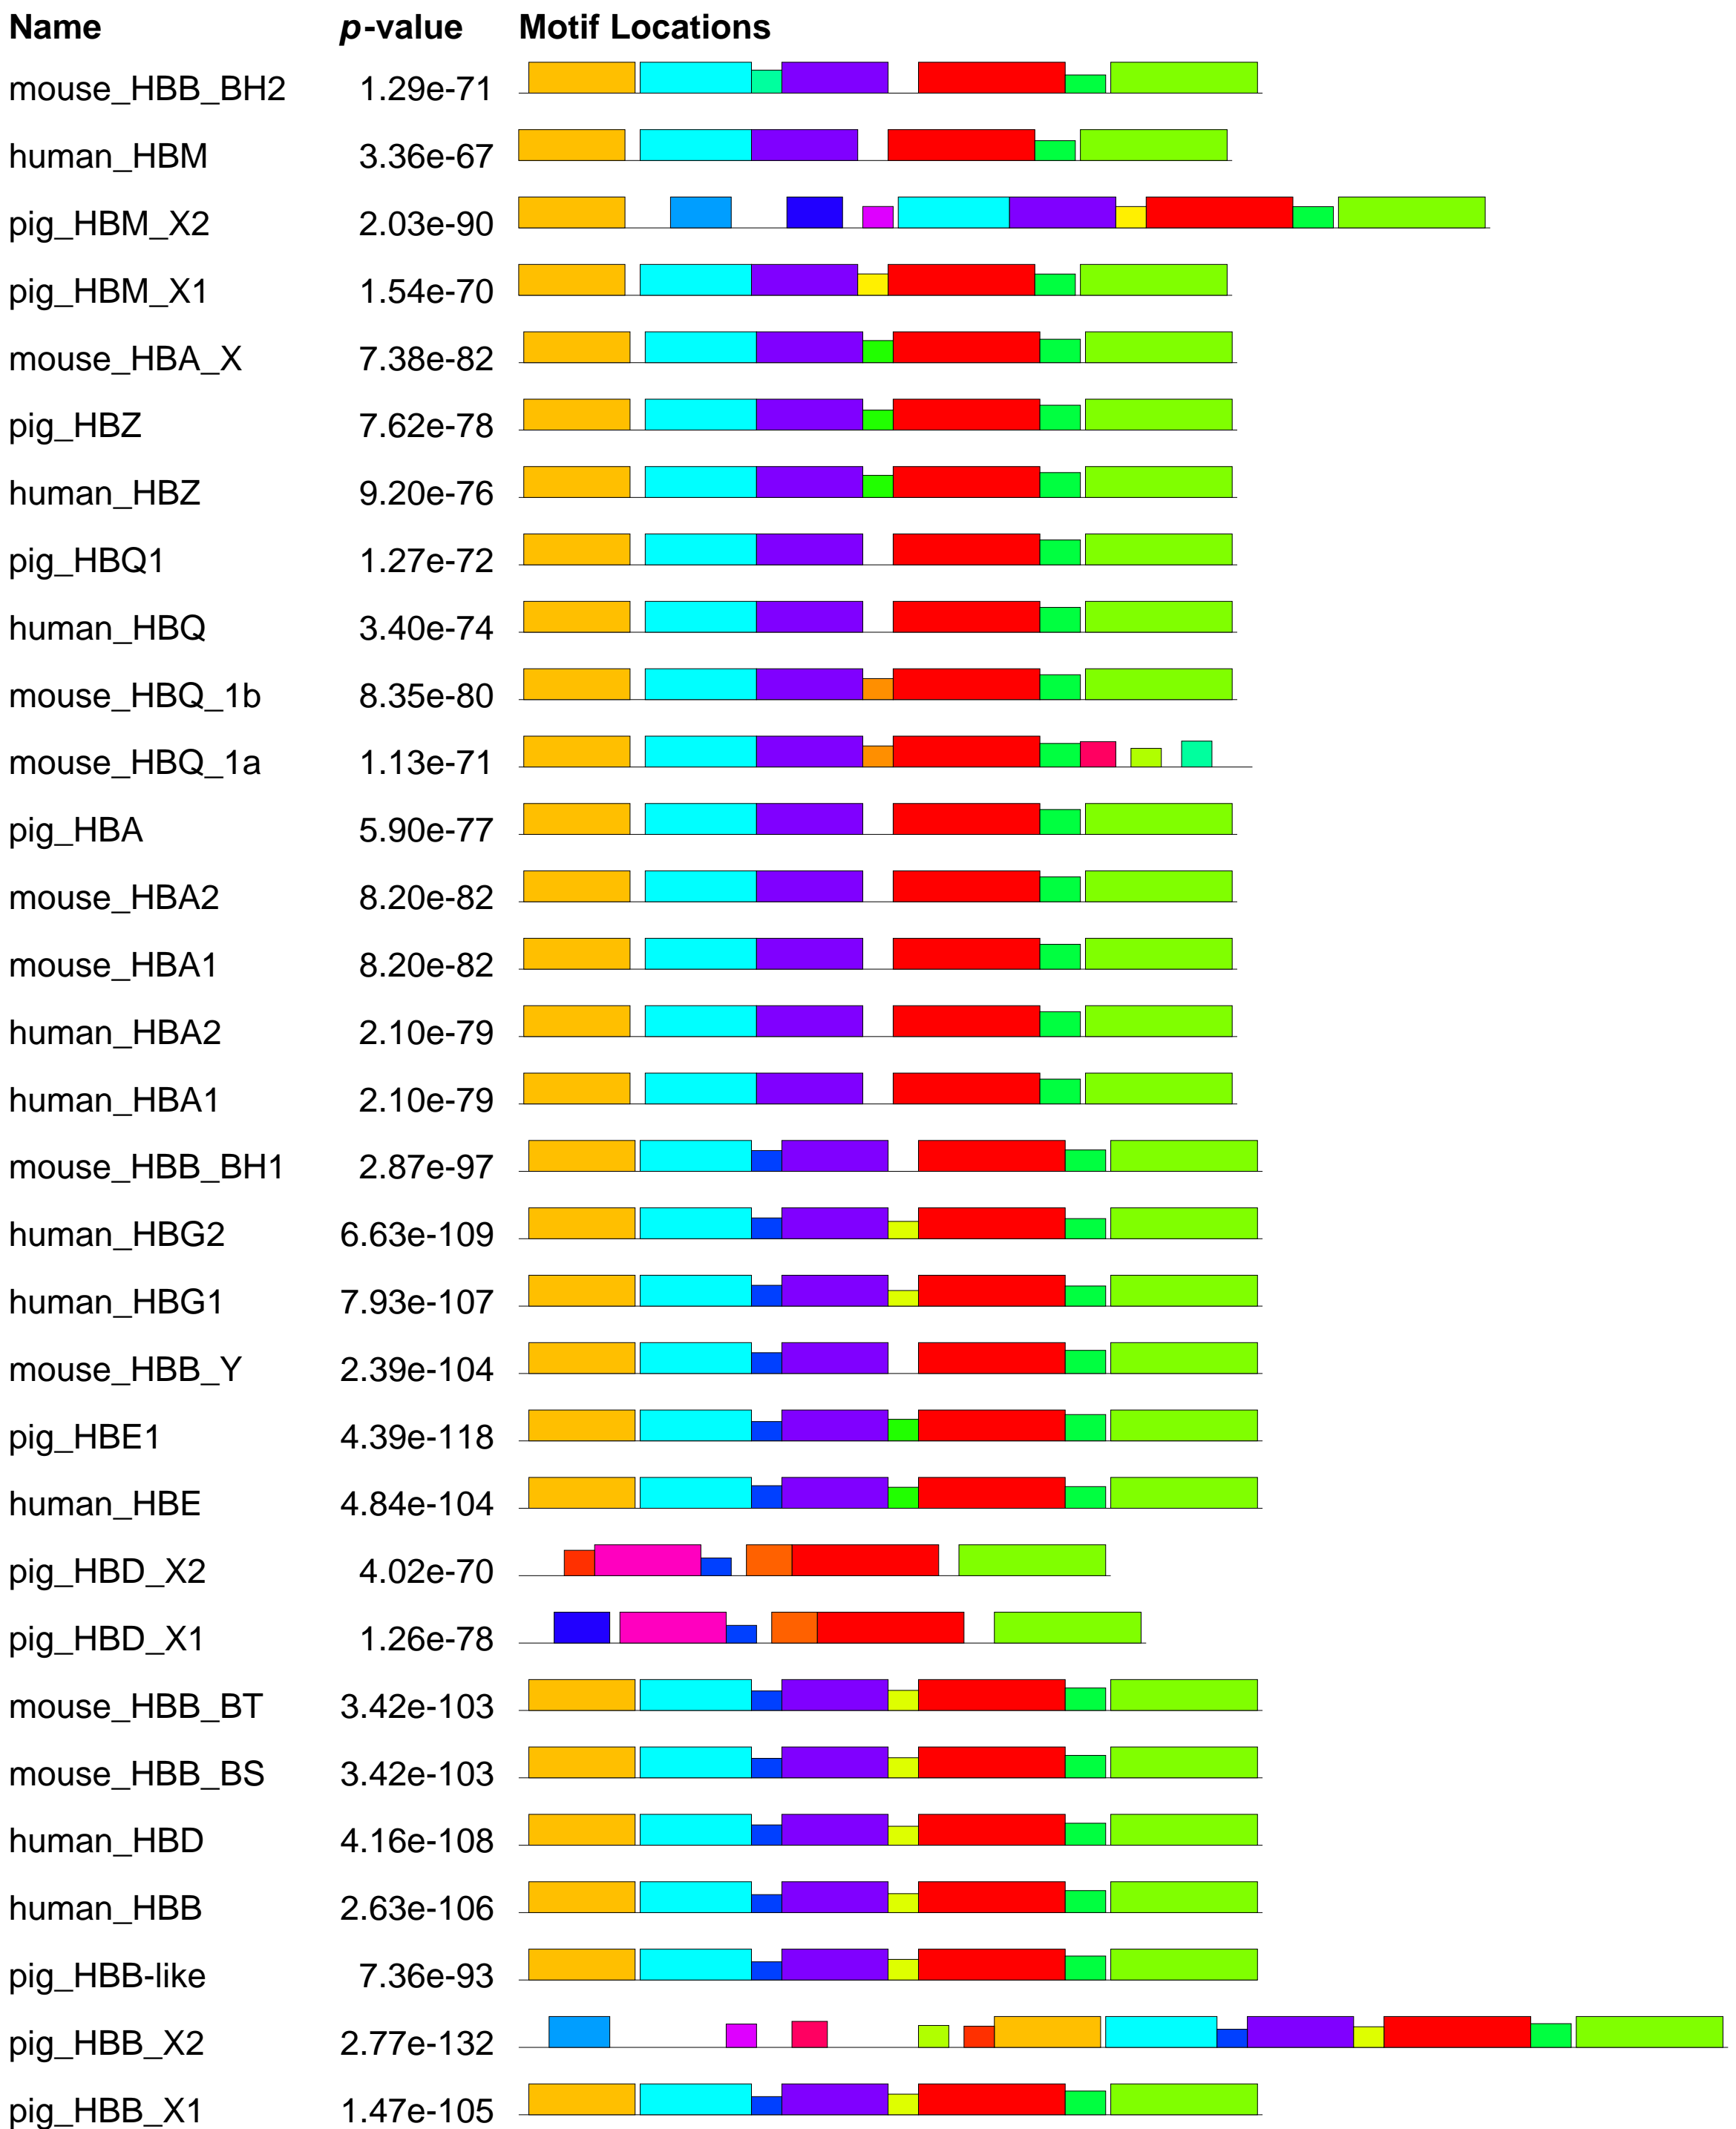

| Motif | Symbol | Motif Consensus               |
|-------|--------|-------------------------------|
| 1.    |        | DBLKGALAKLSELHCDKLHVDPENFKLLG |
| 2.    |        | GGEALERLFFVYPWTKRYFPHF        |
| 3.    |        | HFGGDFTPEVQAAWQKFVAGVATALAHKY |
| 4.    |        | DAIMGNPQVKAHGKKVLDALG         |
| 5.    |        | HLSAEEKAAVTALWGKVNVEE         |
| 6.    |        | NCLVVVLA                      |
| 7.    |        | GBLSSA                        |
| 8.    |        | MRQICGAPGGPPRTQRFDDNF         |
| 9.    |        | MGNPRVKHT                     |
| 10.   |        | DGLKHL                        |
| 11.   |        | DAVKSI                        |
| 12.   |        | GDCDFC                        |
| 13.   |        | CWVGEEPRGPQR                  |
| 14.   |        | GGRKEGFPGVW                   |
| 15.   |        | PKEPRP                        |
| 16.   |        | RHRPGDR                       |
| 17.   |        | QTGNWN                        |
| 18.   |        | LATQHL                        |
| 19.   |        | VAVQHV                        |
| 20.   |        | KDPCLL                        |
